# Supplementary material for: Increasing histone acetylation improves sociability and restores learning and memory in KAT6B-haploinsufficient mice
Source: JCI journal article supplement (doi:10.1172/jci167672), 2024-03-31

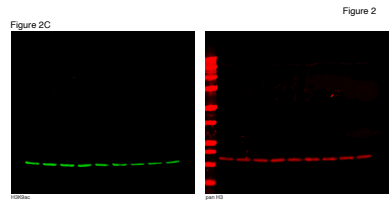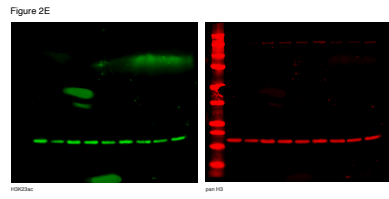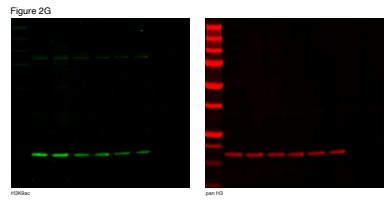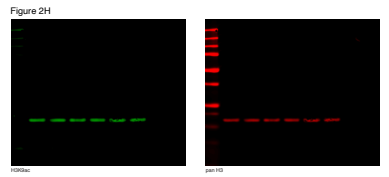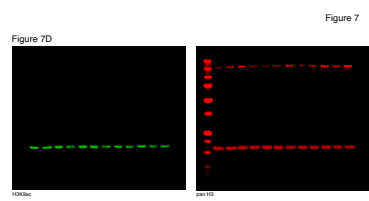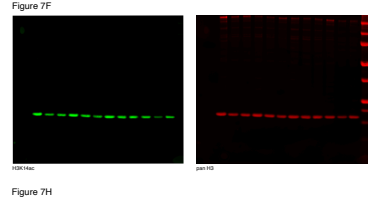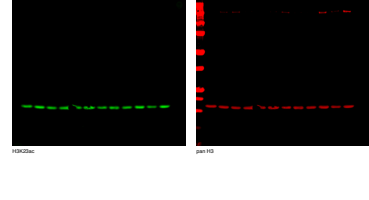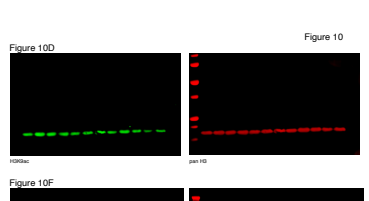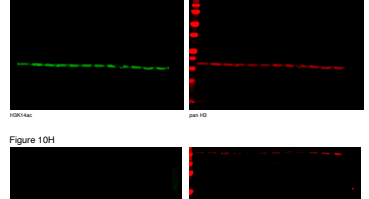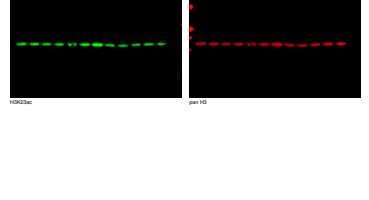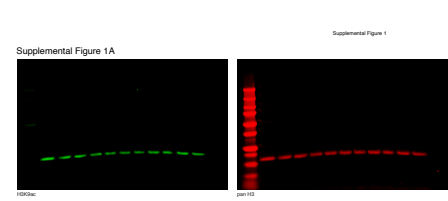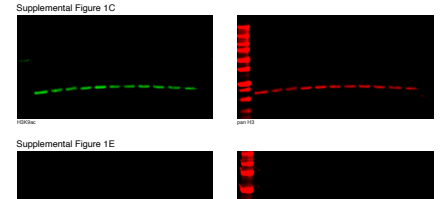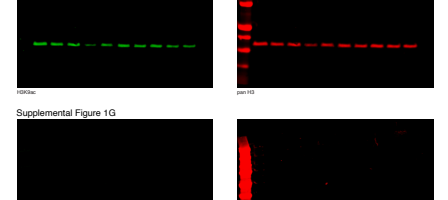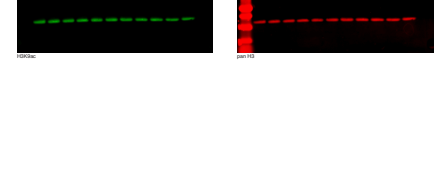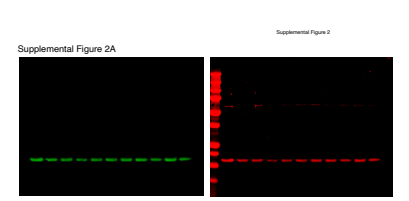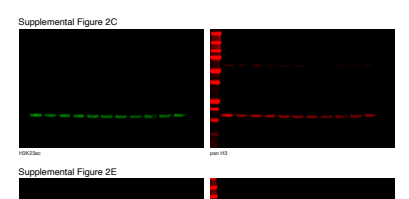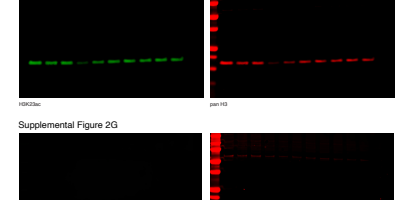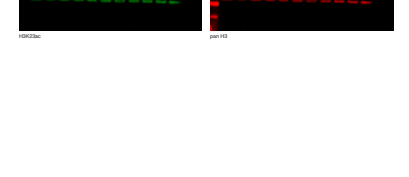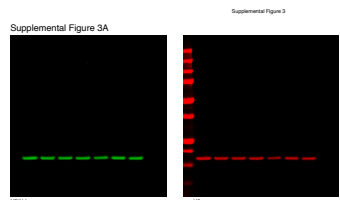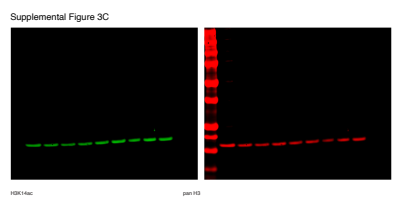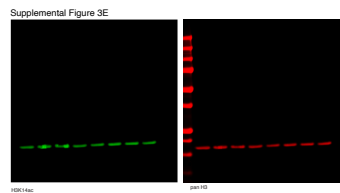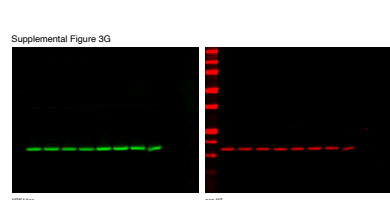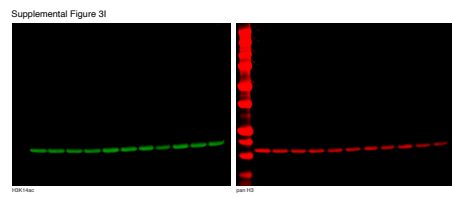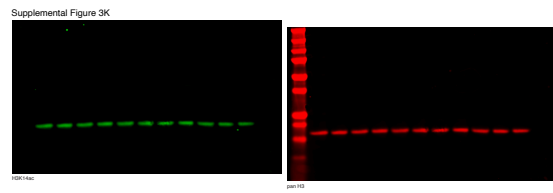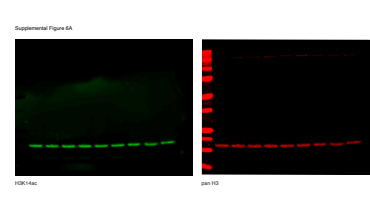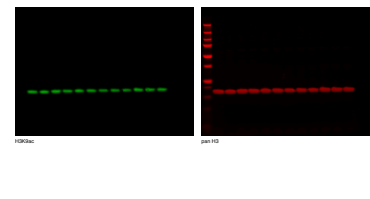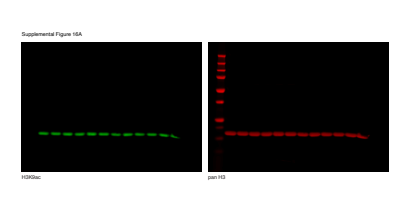

Supplemental Figure 13A

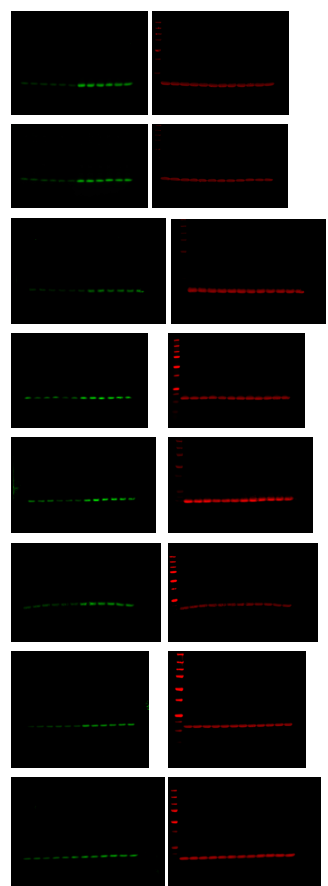

Supplemental Figure 13B

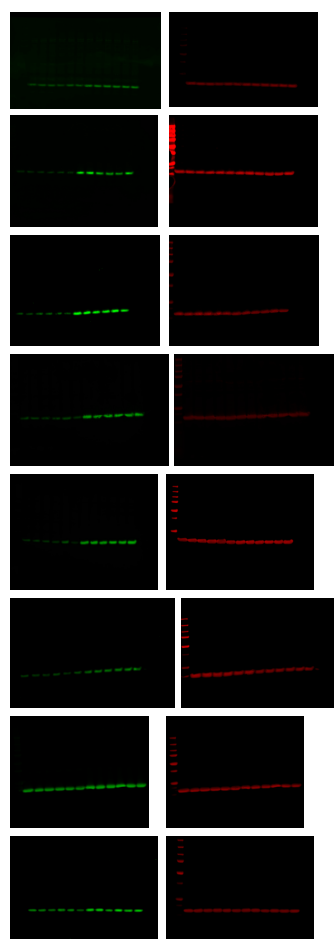

Supplemental Figure 13C

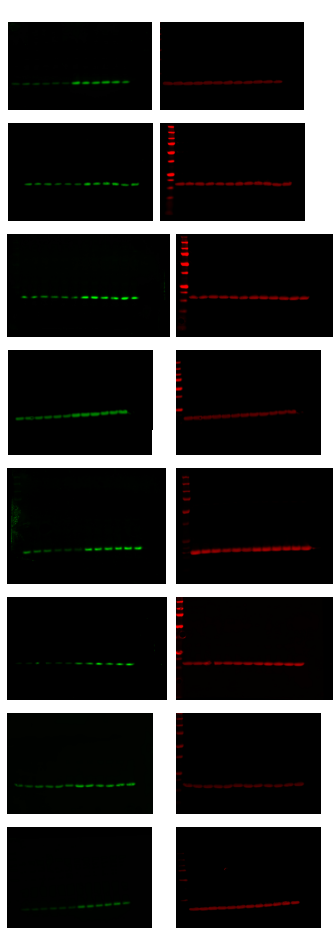

Supplemental Figure 15A

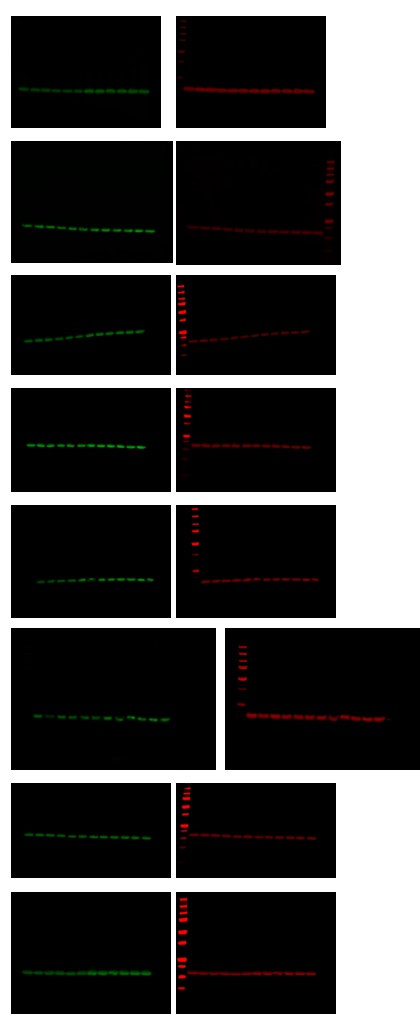

Supplemental Figure 15B

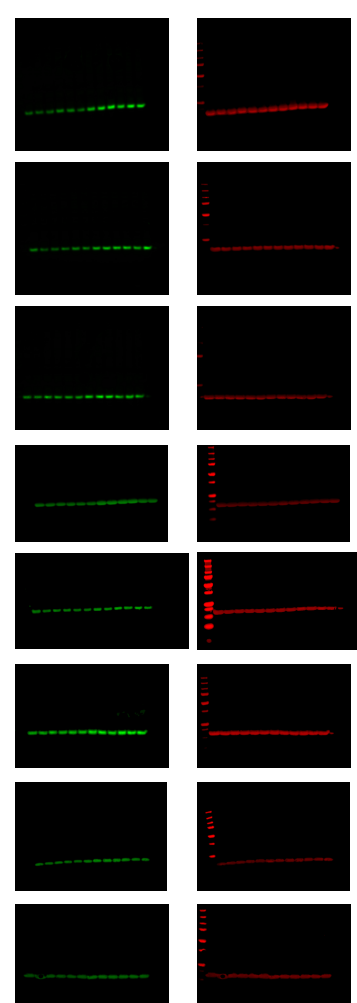

Supplemental Figure 15C

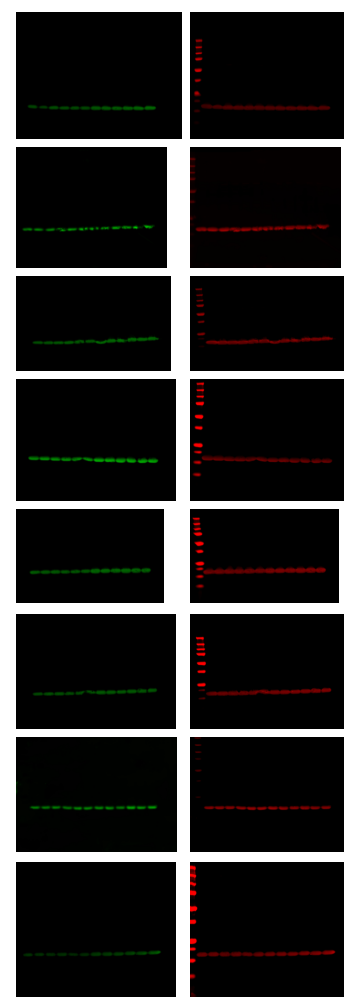

Supplement: sd2 [file 2]
